# Supplementary material
Source: PubMed Central journal article supplement (PMC8928181)

**Study** **Weight** **Prevalence, 95% CI**

|                        |      |                   |
|------------------------|------|-------------------|
| Aydingoz (1999)[45]    | 3.9% | 0.58 [0.42; 0.73] |
| Bregy (2008)[26]       | 4.3% | 0.38 [0.31; 0.46] |
| Chisti (2012)[46]      | 4.2% | 0.63 [0.53; 0.72] |
| Deloche (2007)[18]     | 4.4% | 0.50 [0.48; 0.52] |
| Elethawi (2012)[31]    | 4.0% | 0.71 [0.54; 0.85] |
| Fatani (2015)[48]      | 4.3% | 0.64 [0.58; 0.70] |
| Gangaiah (2019)[28]    | 4.1% | 0.85 [0.70; 0.94] |
| Hodeib (2017)[20]      | 3.9% | 0.62 [0.46; 0.77] |
| Islamoglu (2018)[16]   | 4.3% | 0.83 [0.74; 0.89] |
| Karim (2010)[21]       | 3.9% | 0.77 [0.58; 0.90] |
| Malkud (2015)[50]      | 4.2% | 0.50 [0.40; 0.60] |
| Moienvaziri (2009)[22] | 4.2% | 0.93 [0.78; 0.99] |
| Moltz (1988)[14]       | 4.2% | 0.42 [0.33; 0.52] |
| Obaidat (2005)[52]     | 4.1% | 0.69 [0.57; 0.80] |
| Olsen (2010)[29]       | 4.3% | 0.48 [0.42; 0.53] |
| Ozden (2008)[53]       | 4.2% | 0.36 [0.27; 0.46] |
| Park (2013)[54]        | 4.2% | 0.58 [0.49; 0.68] |
| Raichur (2017)[25]     | 4.1% | 0.82 [0.67; 0.93] |
| Rushton (1990)[43]     | 4.1% | 0.72 [0.58; 0.84] |
| Rushton (2002)[56]     | 4.3% | 0.65 [0.58; 0.72] |
| Sarkar (2013)[57]      | 3.9% | 0.38 [0.23; 0.54] |
| Sinclair (2002)[24]    | 4.4% | 0.06 [0.03; 0.11] |
| White (1994)[17]       | 4.2% | 0.95 [0.75; 1.00] |
| Zhang (2012)[27]       | 4.3% | 0.10 [0.04; 0.21] |

**Random Effect** **100.0%** **0.59 [0.49; 0.69]**

Heterogeneity:  $I^2 = 98\%$ ,  $\tau^2 = 0.0515$ ,  $\chi^2_{23} = 1185.53$  ( $p < 0.01$ )

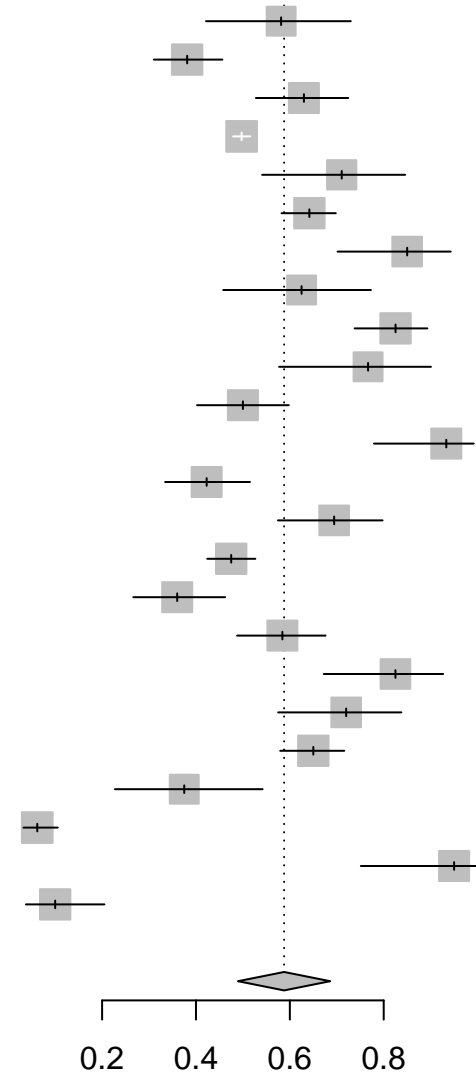

Supplement: sad-0008-0083-s03.pdf [file sad-0008-0083-s03.pdf]
