# Supplementary material
Source: PubMed Central journal article supplement (PMC8928181)

| Study                                                                                | Weight        | Prevalence, 95% CI       |
|--------------------------------------------------------------------------------------|---------------|--------------------------|
| Aydingoz (1999)[46]                                                                  | 16.8%         | 0.16 [0.07; 0.31]        |
| Deloche (2007)[18]                                                                   | 22.8%         | 0.08 [0.07; 0.09]        |
| Gangaiah (2019)[28]                                                                  | 14.9%         | 0.25 [0.13; 0.41]        |
| Olsen (2010)[29]                                                                     | 22.8%         | 0.01 [0.00; 0.03]        |
| Sinclair (2002)[24]                                                                  | 22.8%         | 0.00 [0.00; 0.02]        |
| <b>Random Effect</b>                                                                 | <b>100.0%</b> | <b>0.08 [0.00; 0.21]</b> |
| Heterogeneity: $I^2 = 97\%$ , $\tau^2 = 0.0088$ , $\chi^2_4 = 155.93$ ( $p < 0.01$ ) |               |                          |

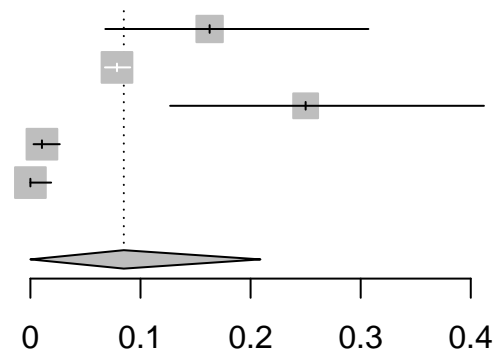

Supplement: sad-0008-0083-s04.pdf [file sad-0008-0083-s04.pdf]
